# Supplementary material for: Preparation, Property Characterization of Gd2YSbO7/ZnBiNbO5 Heterojunction Photocatalyst for Photocatalytic Degradation of Benzotriazole under Visible Light Irradiation
Source: MDPI journal article supplement (doi:10.3390/catal12020159), 2022-01-27
Supplement: s1 [file s1]

# **Supporting information for Preparation, property characterization of $\text{Gd}_2\text{YSbO}_7/\text{ZnBiNbO}_5$ heterojunction photocatalyst for photocatalytic degradation of benzotriazole under visible light irradiation**

Ye Yao<sup>1</sup> and Jingfei Luan<sup>1,2,\*</sup>

<sup>1</sup> School of Physics, Changchun Normal University, Changchun, Jilin 130032, PR China

<sup>2</sup> State Key Laboratory of Pollution Control and Resource Reuse, School of the Environment, Nanjing University, Nanjing 210093, People's Republic of China

\* Correspondence: Corresponding author. E-mail address: jfluan@nju.edu.cn (J.F. Luan)

Tel.: +86 (0) 19951939498

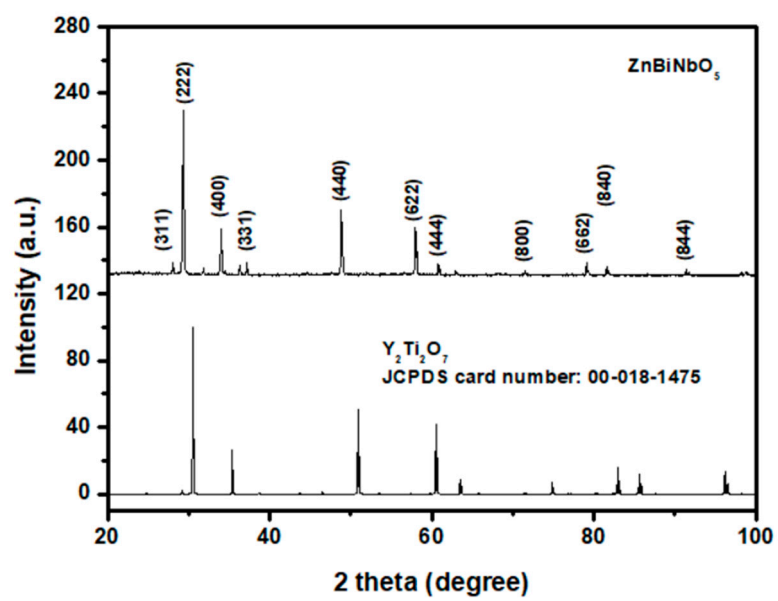

Figure S1. X-ray powder diffraction patterns of  $\text{ZnBiNbO}_5$  and JCPDS of  $\text{Y}_2\text{Ti}_2\text{O}_7$ .

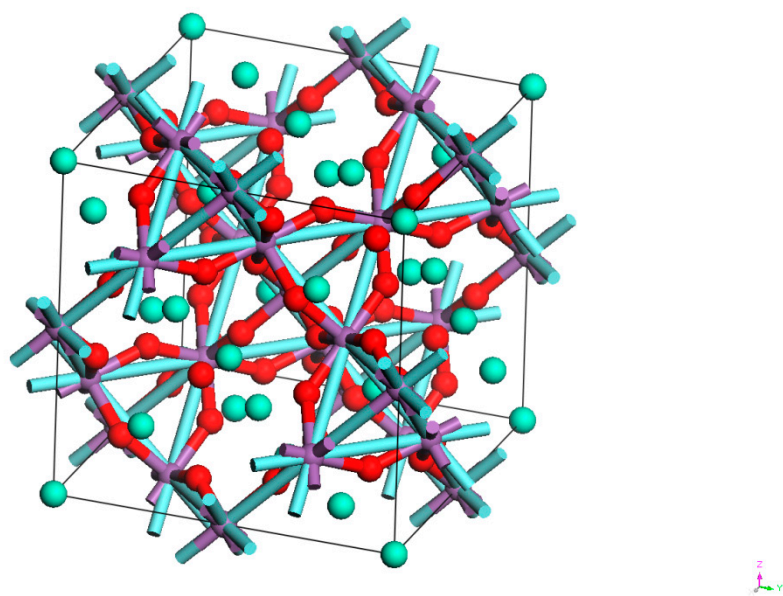

**Figure S2.** Atomic structure of  $\text{ZnBiNbO}_5$ . (Red atom: O, cyan atom: Zn, purple atom: Bi or Nb.).

**Table S1.** Structural parameters of Gd<sub>2</sub>YSbO<sub>7</sub> prepared by solid state reaction method.

| Atom | x      | y     | z     | Occupation<br>factor |
|------|--------|-------|-------|----------------------|
| Gd   | 0      | 0     | 0     | 1                    |
| Y    | 0.5    | 0.5   | 0.5   | 0.5                  |
| Sb   | 0.5    | 0.5   | 0.5   | 0.5                  |
| O(1) | -0.185 | 0.125 | 0.125 | 1                    |
| O(2) | 0.125  | 0.125 | 0.125 | 1                    |

**Table S2.** Structural parameters of ZnBiNbO<sub>5</sub> prepared by solid state reaction method.

| Atom | x     | y     | z     | Occupation<br>factor |
|------|-------|-------|-------|----------------------|
| Zn   | 0.5   | 0.5   | 0.5   | 1                    |
| Bi   | 0     | 0     | 0     | 1                    |
| Nb   | 0.5   | 0.5   | 0.5   | 1                    |
| O(1) | 0.125 | 0.125 | 0.125 | 0.5                  |
| O(2) | 0.125 | 0.125 | 0.375 | 1                    |



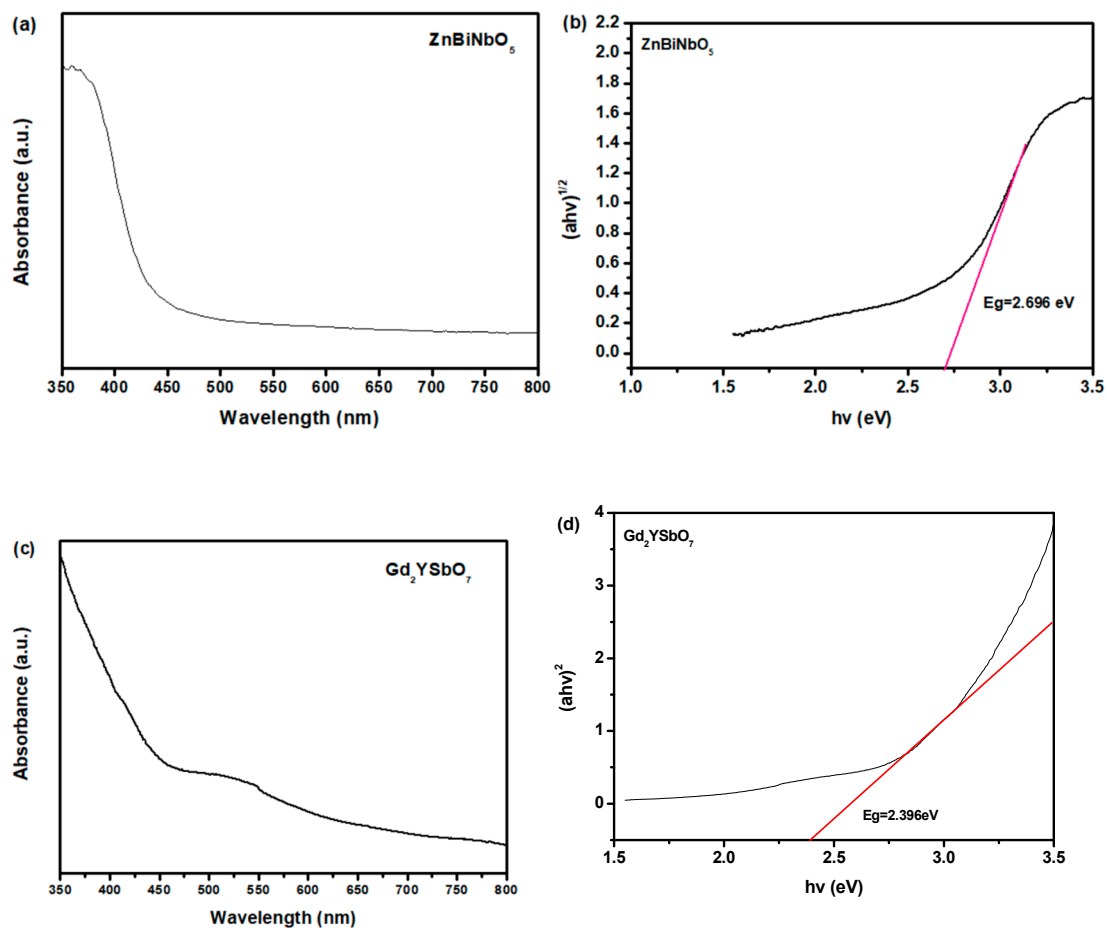

**Figure S3.** (a) UV-Vis diffuse reflectance spectrum of ZnBiNbO<sub>5</sub> sample; (b) Plot of  $(\alpha h\nu)^{1/2}$  versus  $h\nu$  for ZnBiNbO<sub>5</sub>; (c) UV-Vis diffuse reflectance spectrum of Gd<sub>2</sub>YSbO<sub>7</sub> sample; (d) Plot of  $(\alpha h\nu)^{1/2}$  versus  $h\nu$  for Gd<sub>2</sub>YSbO<sub>7</sub> sample.

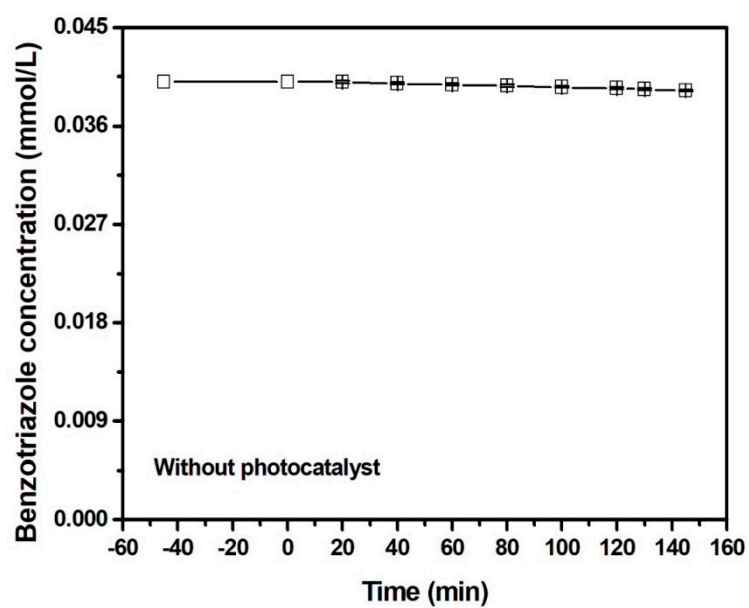

**Figure S4.** Concentration variation curves of benzotriazole during photocatalytic degradation of benzotriazole in the absence of photocatalyst under VLIR.

**Table S3.** The removal rate of benzotriazole with Gd<sub>2</sub>YSbO<sub>7</sub>/ZnBiNbO<sub>5</sub> heterojunction (GZH), S-TiO<sub>2</sub>, N-TiO<sub>2</sub>, C-TiO<sub>2</sub> or CdS-TiO<sub>2</sub> as photocatalyst.

|                                                       | GZH  | N-TiO <sub>2</sub> | S-TiO <sub>2</sub> | C-TiO <sub>2</sub> | CdS-TiO <sub>2</sub> |
|-------------------------------------------------------|------|--------------------|--------------------|--------------------|----------------------|
| <b>Initial<br/>concentration of<br/>benzotriazole</b> | 0.04 | 0.04               | 0.04               | 0.04               | 0.04                 |



|                                           |        |        |        |        |        |
|-------------------------------------------|--------|--------|--------|--------|--------|
| <b>(mmol/L)</b>                           |        |        |        |        |        |
| <b>Visible light<br/>irradiation time</b> |        |        |        |        |        |
|                                           | 145    | 145    | 145    | 145    | 145    |
| <b>(min)</b>                              |        |        |        |        |        |
| <b>Removal rate</b>                       | 99.05% | 47.30% | 45.31% | 44.15% | 75.28% |

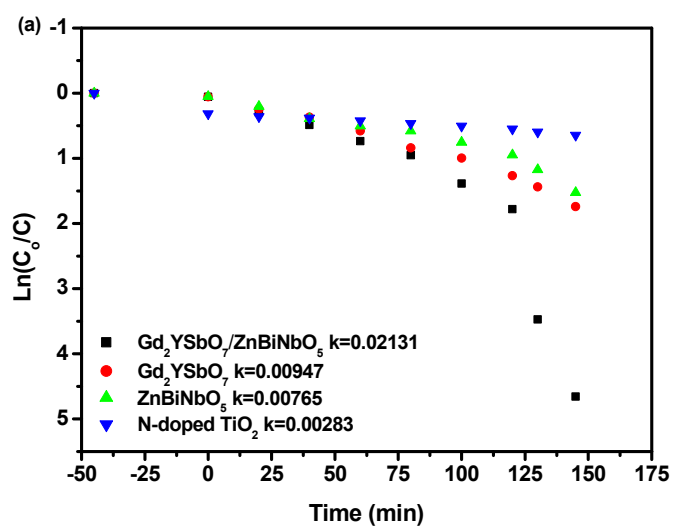

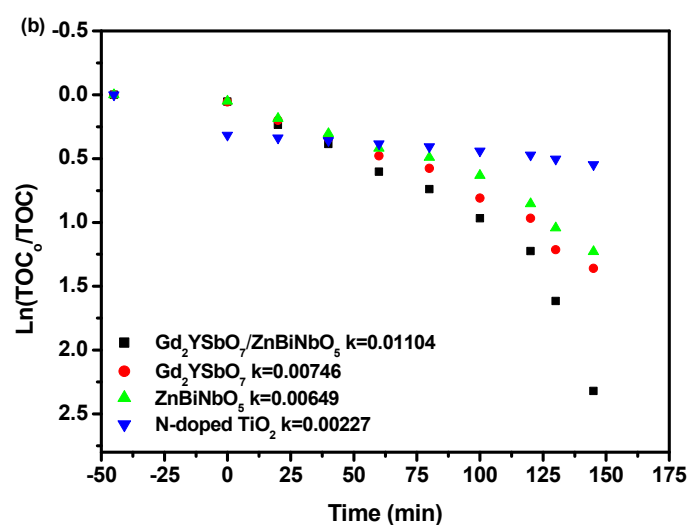

**Figure S5.** (a) Observed first-order kinetic plots for the photocatalytic degradation of benzotriazole with  $\text{Gd}_2\text{YSbO}_7/\text{ZnBiNbO}_5$  heterojunction as photocatalyst or with  $\text{Gd}_2\text{YSbO}_7$  as photocatalyst or with  $\text{ZnBiNbO}_5$  as photocatalyst or with NTO as photocatalyst under VLIR; (b) Observed first-order kinetic plots for total organic carbon during photocatalytic degradation of benzotriazole in chemical industry wastewater with  $\text{Gd}_2\text{YSbO}_7/\text{ZnBiNbO}_5$  heterojunction as photocatalyst or with  $\text{Gd}_2\text{YSbO}_7$  as photocatalyst or with  $\text{ZnBiNbO}_5$  as photocatalyst or with NTO as photocatalyst under VLIR.

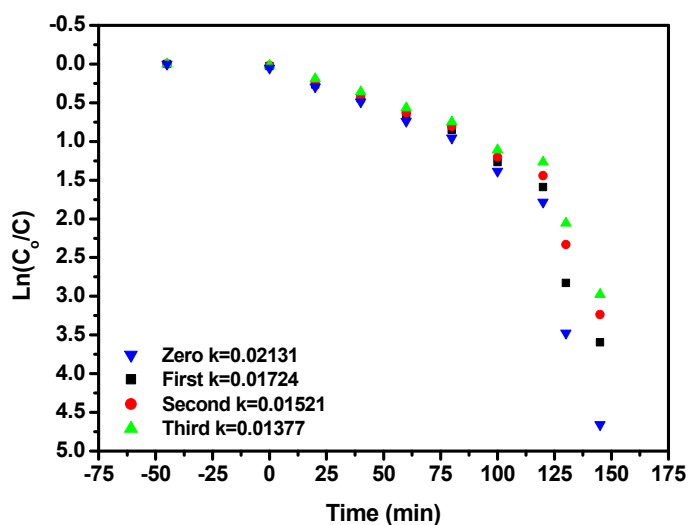

**Figure S6.** Observed first-order kinetic plots for the photocatalytic degradation of benzotriazole with  $\text{Gd}_2\text{YSbO}_7/\text{ZnBiNbO}_5$  heterojunction as photocatalyst under VLIR for three cycle degradation tests.

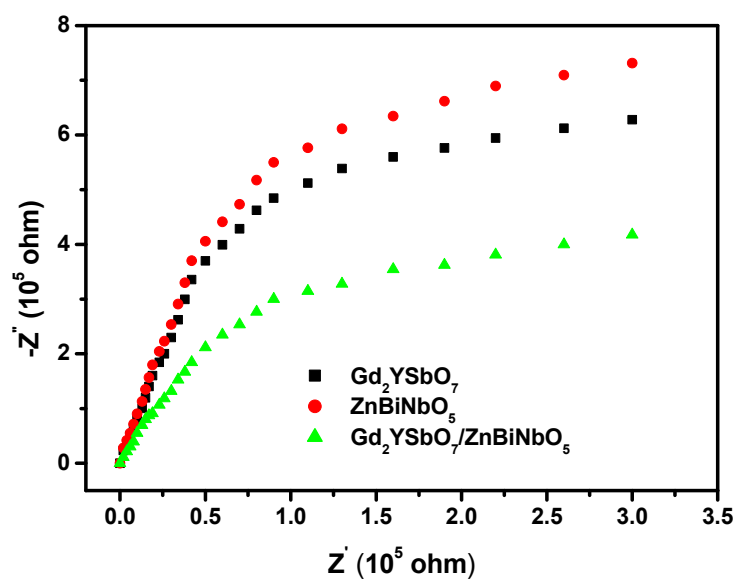

**Figure S7.** Nyquist impedance plots of  $Gd_2YSbO_7/ZnBiNbO_5$  heterojunction photocatalyst or  $Gd_2YSbO_7$  photocatalyst or  $ZnBiNbO_5$  photocatalyst.



(a)

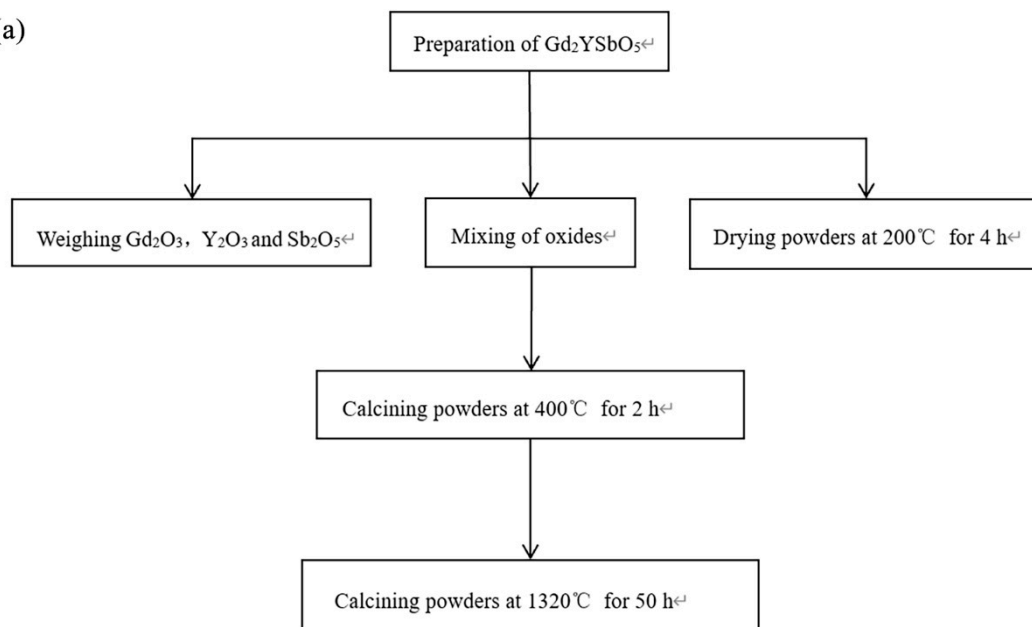

(b)

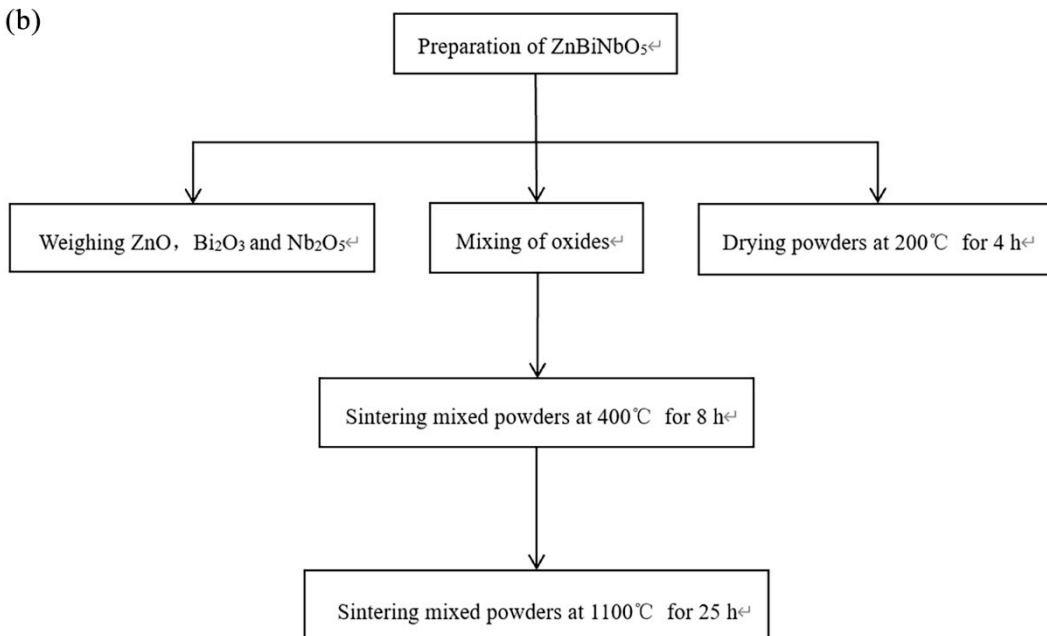

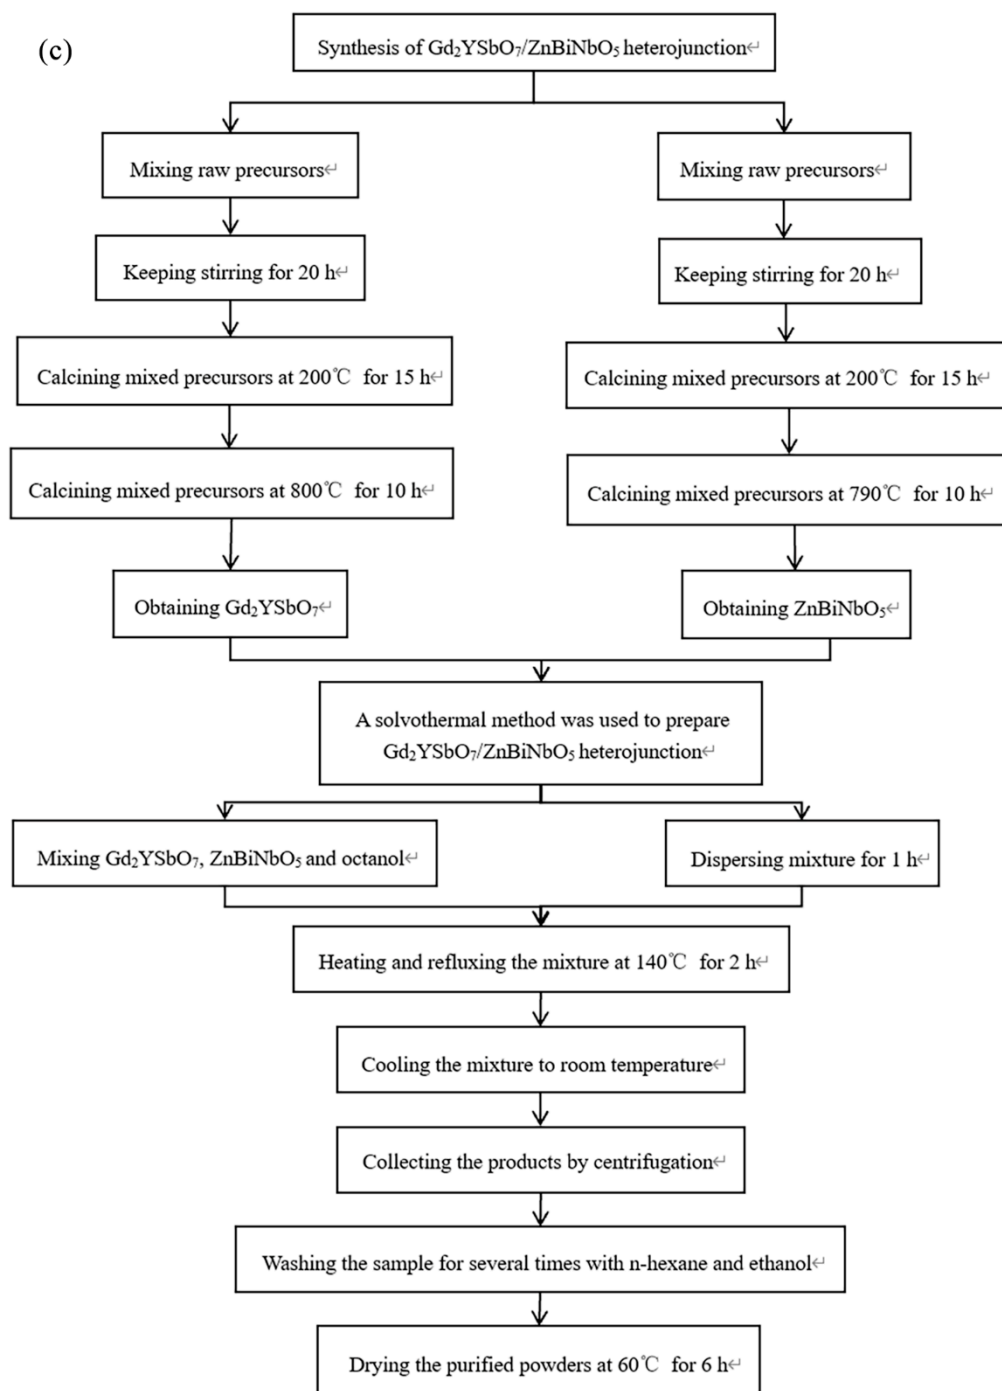

**Figure S8.** (a) Schematic representation of the synthesis process of the  $\text{Gd}_2\text{YSbO}_7$ ; (b) Schematic representation of the synthesis process of the  $\text{ZnBiNbO}_5$ ; (c) Schematic representation of the synthesis process of the  $\text{Gd}_2\text{YSbO}_7/\text{ZnBiNbO}_5$  heterojunction photocatalyst.
